# Supplementary material for: Dietary polyphenol canolol from rapeseed oil attenuates oxidative stress-induced cell damage through the modulation of the p38 signaling pathway
Source: Royal Society of Chemistry journal article supplement (doi:10.1039/c8ra04130j), 2018-01-01
Supplement: c8ra04130j1.pdf [file c8ra04130j1.pdf]

**Electronic supplementary information (ESI)**

**Dietary polyphenol canolol from rapeseed oil attenuates oxidative  
stress-induced cell damage through the modulation of p38 signaling  
pathway**

Xiaoyang Xia,<sup>a</sup> Xia Xiang,<sup>\*a</sup> Fenghong Huang,<sup>\*a</sup> Mingming Zheng,<sup>a</sup> Renhuai Cong,<sup>b</sup>

Ling Han,<sup>a</sup> Zhen Zhang<sup>a</sup>

<sup>a</sup>Crops Research Institute of the Chinese Academy of Agricultural Sciences, Oil Crops and Lipids Process Technology  
National & Local Joint Engineering Laboratory, Key Laboratory of Oilseeds processing, Ministry of Agriculture, Hubei  
Key Laboratory of Lipid Chemistry and Nutrition, Key Laboratory of Biology and Genetic Improvement of Oil Crops,  
Ministry of Agriculture, Wuhan 430062, China.

<sup>b</sup>Infinitus (China) Company. Ltd

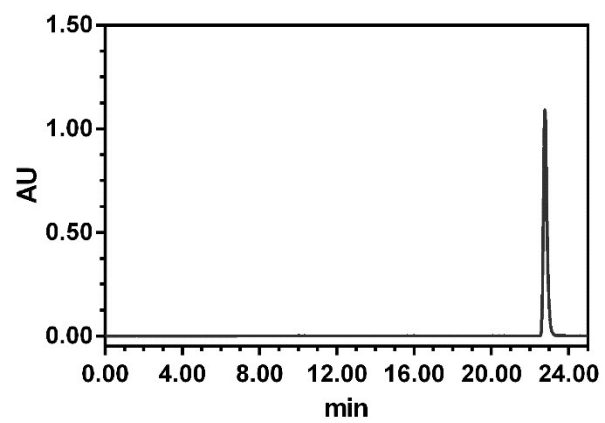

**Fig. S1** Reverse-phase UPLC chromatogram of canolol measured at 270 nm, Time axis is in minutes.

**Table S1.** The characterization of canolol (CAO) by  $^1\text{H}$ NMR and  $^{13}\text{C}$ NMR.

| Molecular Structure                                                               | Positon          | $^1\text{H}$ $\delta$ (ppm) | $^{13}\text{C}$ $\delta$ (ppm) |
|-----------------------------------------------------------------------------------|------------------|-----------------------------|--------------------------------|
|                                                                                   | 1                | -                           | 129.21                         |
|                                                                                   | 2,6              | 6.67(2H,s)                  | 103.07                         |
|                                                                                   | 3,5              | -                           | 134.85                         |
| 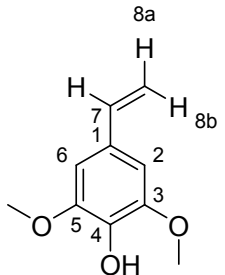 | 4                | 5.56(1H,s)                  | 136.87                         |
|                                                                                   | 7                | 6.64(1H,dd)                 | 147.12                         |
|                                                                                   |                  | J7, 8b=17.5Hz               |                                |
|                                                                                   |                  | J7, 8a=10.8Hz               |                                |
|                                                                                   | 8a               | 5.17(1H,dd)                 |                                |
|                                                                                   |                  | J7, 8a=10.8Hz               |                                |
|                                                                                   |                  | J8b, 8a=0.6Hz               |                                |
|                                                                                   | 8b               | 5.62(1H,dd)                 | 111.86                         |
|                                                                                   |                  | J7, 8b=17.5Hz               |                                |
|                                                                                   |                  | J8a, 8b=0.7Hz               |                                |
|                                                                                   | OCH <sub>3</sub> | 3.93 (6H,s)                 | 56.38                          |
